# Supplementary material
Source: PubMed Central journal article supplement (PMC3122194)
Supplement: supp_M110.175042_jbc.M110.175042-1.pdf [file supp_M110.175042_jbc.M110.175042-1.pdf]

## SUPPLEMENTARY TABLE LEGENDS

**SUPPLEMENTARY TABLE ST1. Structure interpretations of the mutual fragments which were found in all four derivatized 66-kDa N-glycans that have been released after PNGase F digestion in the positive ion MS/MS spectra.**

**SUPPLEMENTARY TABLE ST2. Structure interpretations of the fragments which were found in the positive ion MS/MS spectra for the most abundant 2AB-labeled N-glycan released by Endo H:  $m/z$  1834.5.**

SUPPLEMENTARY TABLE ST1

| <i>m/z</i> , (Positive ion, [M+Na] <sup>+</sup> ) |         | Composition |                 |     |        |                   | Proposed structure                                                                                                                                                                                                                                                                                                                                                                                                                                                                                                                                                                                                                                                                                                                                                                                                                                                                                                                                                                                                                                                                                                                                                                                                                                                                                                                                                                                                                                                                                                                                                                                                                                                                                                                                                                                                                                                                                                                                        |  |
|---------------------------------------------------|---------|-------------|-----------------|-----|--------|-------------------|-----------------------------------------------------------------------------------------------------------------------------------------------------------------------------------------------------------------------------------------------------------------------------------------------------------------------------------------------------------------------------------------------------------------------------------------------------------------------------------------------------------------------------------------------------------------------------------------------------------------------------------------------------------------------------------------------------------------------------------------------------------------------------------------------------------------------------------------------------------------------------------------------------------------------------------------------------------------------------------------------------------------------------------------------------------------------------------------------------------------------------------------------------------------------------------------------------------------------------------------------------------------------------------------------------------------------------------------------------------------------------------------------------------------------------------------------------------------------------------------------------------------------------------------------------------------------------------------------------------------------------------------------------------------------------------------------------------------------------------------------------------------------------------------------------------------------------------------------------------------------------------------------------------------------------------------------------------|--|
| Found*                                            | Calc.   | Hex         | <i>O</i> -MeHex | Xyl | GlcNAc | Other             |                                                                                                                                                                                                                                                                                                                                                                                                                                                                                                                                                                                                                                                                                                                                                                                                                                                                                                                                                                                                                                                                                                                                                                                                                                                                                                                                                                                                                                                                                                                                                                                                                                                                                                                                                                                                                                                                                                                                                           |  |
| 203.7                                             |         |             |                 |     |        |                   | <br>                                                                                                                                                                                                                                                                                                                                                                                                                                                                                                                                                                                                                                                                                                                                                                                                                                                                                                                                                                                                                                                                                                                                                                                                                                                                                                                                                                                                                                                                                                                                                                                                                                                                                                                                                                                |  |
| 203.6                                             | 203.06  | 1           | 0               | 0   | 0      | 0                 |                                                                                                                                                                                                                                                                                                                                                                                                                                                                                                                                                                                                                                                                                                                                                                                                                                                                                                                                                                                                                                                                                                                                                                                                                                                                                                                                                                                                                                                                                                                                                                                                                                                                                                                                                                                                                                                                                                                                                           |  |
| 203.6                                             | 203.08  | 0           | 0               | 0   | 1      | -H <sub>2</sub> O |                                                                                                                                                                                                                                                                                                                                                                                                                                                                                                                                                                                                                                                                                                                                                                                                                                                                                                                                                                                                                                                                                                                                                                                                                                                                                                                                                                                                                                                                                                                                                                                                                                                                                                                                                                                                                                                                                                                                                           |  |
| 203.7                                             |         |             |                 |     |        |                   |                                                                                                                                                                                                                                                                                                                                                                                                                                                                                                                                                                                                                                                                                                                                                                                                                                                                                                                                                                                                                                                                                                                                                                                                                                                                                                                                                                                                                                                                                                                                                                                                                                                                                                                                                                                                                                                                                                                                                           |  |
| 364.3                                             |         |             |                 |     |        |                   |  — 2AB<br> — β 4 —                                                                                                                                                                                                                                                                                                                                                                                                                                                                                                                                                                                                                                                                                                                                                                                                                                                                                                                                                                                                                                                                                                                                                                                                                                                                                                                                                                                                                                                                                                                                                                                                                                                                               |  |
| 364.8                                             | 364.15  | 0           | 0               | 0   | 1      | 2AB               |                                                                                                                                                                                                                                                                                                                                                                                                                                                                                                                                                                                                                                                                                                                                                                                                                                                                                                                                                                                                                                                                                                                                                                                                                                                                                                                                                                                                                                                                                                                                                                                                                                                                                                                                                                                                                                                                                                                                                           |  |
| 364.4                                             | 365.13  | 1           | 0               | 0   | 1      | -H <sub>2</sub> O |                                                                                                                                                                                                                                                                                                                                                                                                                                                                                                                                                                                                                                                                                                                                                                                                                                                                                                                                                                                                                                                                                                                                                                                                                                                                                                                                                                                                                                                                                                                                                                                                                                                                                                                                                                                                                                                                                                                                                           |  |
| 364.5                                             |         |             |                 |     |        |                   |                                                                                                                                                                                                                                                                                                                                                                                                                                                                                                                                                                                                                                                                                                                                                                                                                                                                                                                                                                                                                                                                                                                                                                                                                                                                                                                                                                                                                                                                                                                                                                                                                                                                                                                                                                                                                                                                                                                                                           |  |
| 567.3                                             |         |             |                 |     |        |                   |  — β 4 —  — 2AB<br> — α 6 —  — β 4 —   — α 3 —  — β 4 —                                                                                                                                                                                                                                                                                                                                                                                                                                                                                                                                                                                                                                                                                                                                                                                                                                                                                                                                                                                                                                                                                                                                                                                                           |  |
| 567.6                                             | 567.23  | 0           | 0               | 0   | 2      | 2AB               |                                                                                                                                                                                                                                                                                                                                                                                                                                                                                                                                                                                                                                                                                                                                                                                                                                                                                                                                                                                                                                                                                                                                                                                                                                                                                                                                                                                                                                                                                                                                                                                                                                                                                                                                                                                                                                                                                                                                                           |  |
| 567.3                                             | 568.18  | 2           | 0               | 0   | 1      |                   |                                                                                                                                                                                                                                                                                                                                                                                                                                                                                                                                                                                                                                                                                                                                                                                                                                                                                                                                                                                                                                                                                                                                                                                                                                                                                                                                                                                                                                                                                                                                                                                                                                                                                                                                                                                                                                                                                                                                                           |  |
| 567.3                                             |         |             |                 |     |        |                   |                                                                                                                                                                                                                                                                                                                                                                                                                                                                                                                                                                                                                                                                                                                                                                                                                                                                                                                                                                                                                                                                                                                                                                                                                                                                                                                                                                                                                                                                                                                                                                                                                                                                                                                                                                                                                                                                                                                                                           |  |
| 655.4                                             |         |             |                 |     |        |                   | <br> —  —                                                                                                                                                                                                                                                                                                                                                                                                                                                                                                                                                                                                                                                                                                                                                                                                                                                                                                                                                                                                                                                                                                                                                                                                                                                                                                                                                                                                                                                                                                                                                                                                  |  |
| 655.2                                             | 655.21  | 2           | 1               | 1   | 0      | -H <sub>2</sub> O |                                                                                                                                                                                                                                                                                                                                                                                                                                                                                                                                                                                                                                                                                                                                                                                                                                                                                                                                                                                                                                                                                                                                                                                                                                                                                                                                                                                                                                                                                                                                                                                                                                                                                                                                                                                                                                                                                                                                                           |  |
| 655.9                                             |         |             |                 |     |        |                   |                                                                                                                                                                                                                                                                                                                                                                                                                                                                                                                                                                                                                                                                                                                                                                                                                                                                                                                                                                                                                                                                                                                                                                                                                                                                                                                                                                                                                                                                                                                                                                                                                                                                                                                                                                                                                                                                                                                                                           |  |
| 655.5                                             |         |             |                 |     |        |                   |                                                                                                                                                                                                                                                                                                                                                                                                                                                                                                                                                                                                                                                                                                                                                                                                                                                                                                                                                                                                                                                                                                                                                                                                                                                                                                                                                                                                                                                                                                                                                                                                                                                                                                                                                                                                                                                                                                                                                           |  |
| 817.5                                             |         |             |                 |     |        |                   | <br> —  —  — α 6 —                                                                                                                                                                                                                                                                                                                                                                                                                                                                                                                                                                                                                                                                                                                                                                                                                                                                                                                                                                                                                                                                                                                                                                                                                                                                                                                                                                                                                                                                                               |  |
| 817.1                                             | 817.26  | 3           | 1               | 1   | 0      | -H <sub>2</sub> O |                                                                                                                                                                                                                                                                                                                                                                                                                                                                                                                                                                                                                                                                                                                                                                                                                                                                                                                                                                                                                                                                                                                                                                                                                                                                                                                                                                                                                                                                                                                                                                                                                                                                                                                                                                                                                                                                                                                                                           |  |
| 818.0                                             |         |             |                 |     |        |                   |                                                                                                                                                                                                                                                                                                                                                                                                                                                                                                                                                                                                                                                                                                                                                                                                                                                                                                                                                                                                                                                                                                                                                                                                                                                                                                                                                                                                                                                                                                                                                                                                                                                                                                                                                                                                                                                                                                                                                           |  |
| 817.5                                             |         |             |                 |     |        |                   |                                                                                                                                                                                                                                                                                                                                                                                                                                                                                                                                                                                                                                                                                                                                                                                                                                                                                                                                                                                                                                                                                                                                                                                                                                                                                                                                                                                                                                                                                                                                                                                                                                                                                                                                                                                                                                                                                                                                                           |  |
| 993.7                                             |         |             |                 |     |        |                   |  —  —  —  — α 6 — <br> —  —  —  — α 6 — <br> —  — α 6 — <br> —  — α 3 —                                                                                                                                                                                                                                                                                                                                                                                                                                                                   |  |
| 993.4                                             | 993.33  | 3           | 2               | 1   | 0      | -H <sub>2</sub> O |                                                                                                                                                                                                                                                                                                                                                                                                                                                                                                                                                                                                                                                                                                                                                                                                                                                                                                                                                                                                                                                                                                                                                                                                                                                                                                                                                                                                                                                                                                                                                                                                                                                                                                                                                                                                                                                                                                                                                           |  |
| 993.1                                             |         |             |                 |     |        |                   |                                                                                                                                                                                                                                                                                                                                                                                                                                                                                                                                                                                                                                                                                                                                                                                                                                                                                                                                                                                                                                                                                                                                                                                                                                                                                                                                                                                                                                                                                                                                                                                                                                                                                                                                                                                                                                                                                                                                                           |  |
| 993.5                                             |         |             |                 |     |        |                   |                                                                                                                                                                                                                                                                                                                                                                                                                                                                                                                                                                                                                                                                                                                                                                                                                                                                                                                                                                                                                                                                                                                                                                                                                                                                                                                                                                                                                                                                                                                                                                                                                                                                                                                                                                                                                                                                                                                                                           |  |
| 1154.9                                            |         |             |                 |     |        |                   | <br> —  —  — α 6 — <br> —  —  — α 6 — <br><br> —  —  — α 6 — <br> —  —  — α 6 — <br> —  — α 3 —  |  |
| 1155.1                                            | 1155.38 | 4           | 2               | 1   | 0      | -H <sub>2</sub> O |                                                                                                                                                                                                                                                                                                                                                                                                                                                                                                                                                                                                                                                                                                                                                                                                                                                                                                                                                                                                                                                                                                                                                                                                                                                                                                                                                                                                                                                                                                                                                                                                                                                                                                                                                                                                                                                                                                                                                           |  |
| 1155.2                                            |         |             |                 |     |        |                   |                                                                                                                                                                                                                                                                                                                                                                                                                                                                                                                                                                                                                                                                                                                                                                                                                                                                                                                                                                                                                                                                                                                                                                                                                                                                                                                                                                                                                                                                                                                                                                                                                                                                                                                                                                                                                                                                                                                                                           |  |
| 1154.8                                            |         |             |                 |     |        |                   |                                                                                                                                                                                                                                                                                                                                                                                                                                                                                                                                                                                                                                                                                                                                                                                                                                                                                                                                                                                                                                                                                                                                                                                                                                                                                                                                                                                                                                                                                                                                                                                                                                                                                                                                                                                                                                                                                                                                                           |  |
| 1493.8                                            |         |             |                 |     |        |                   | <br> —  —  — α 6 — <br> —  —  — α 6 — <br><br> —  —  — α 6 — <br> —  —  — α 6 — <br> —  — α 3 —  |  |
| 1493.8                                            | 1493.50 | 5           | 3               | 1   | 0      | -H <sub>2</sub> O |                                                                                                                                                                                                                                                                                                                                                                                                                                                                                                                                                                                                                                                                                                                                                                                                                                                                                                                                                                                                                                                                                                                                                                                                                                                                                                                                                                                                                                                                                                                                                                                                                                                                                                                                                                                                                                                                                                                                                           |  |
| 1494.0                                            |         |             |                 |     |        |                   |                                                                                                                                                                                                                                                                                                                                                                                                                                                                                                                                                                                                                                                                                                                                                                                                                                                                                                                                                                                                                                                                                                                                                                                                                                                                                                                                                                                                                                                                                                                                                                                                                                                                                                                                                                                                                                                                                                                                                           |  |
| 1493.8                                            |         |             |                 |     |        |                   |                                                                                                                                                                                                                                                                                                                                                                                                                                                                                                                                                                                                                                                                                                                                                                                                                                                                                                                                                                                                                                                                                                                                                                                                                                                                                                                                                                                                                                                                                                                                                                                                                                                                                                                                                                                                                                                                                                                                                           |  |

 = GlcNAc  
 = Man  
 = *O*-MeHex  
 = Xyl

\* The four numbers refer to four compounds.

SUPPLEMENTARY TABLE ST2

| <i>m/z</i> (Positive ion, [M+Na] <sup>+</sup> ) |         | Composition |                 |     |        |                          | Proposed structure |
|-------------------------------------------------|---------|-------------|-----------------|-----|--------|--------------------------|--------------------|
| Found*                                          | Calc.   | Hex         | <i>O</i> -MeHex | Xyl | GlcNAc | Other                    |                    |
| 347.7                                           | 347.09  | 2           | 0               | 0   | 0      | -H <sub>2</sub> O        |                    |
| 364.5                                           | 364.15  | 0           | 0               | 0   | 1      | 2AB                      |                    |
|                                                 | 365.13  | 1           | 0               | 0   | 1      | -H <sub>2</sub> O        |                    |
| 507.6                                           | 508.19  | 1           | 0               | 0   | 1      | 2AB<br>-H <sub>2</sub> O |                    |
| 523.4                                           | 523.17  | 2           | 1               | 0   | 0      | -H <sub>2</sub> O        |                    |
| 655.5                                           | 655.21  | 2           | 1               | 1   | 0      | -H <sub>2</sub> O        |                    |
| 685.8                                           | 685.22  | 3           | 1               | 0   | 0      | -H <sub>2</sub> O        |                    |
| 818.3                                           | 817.26  | 3           | 1               | 1   | 0      | -H <sub>2</sub> O        |                    |
| 850.4                                           | 849.30  | 2           | 2               | 1   | 0      |                          |                    |
| 921.1                                           | 920.34  | 2           | 2               | 0   | 1      |                          |                    |
| 993.6                                           | 993.33  | 3           | 2               | 1   | 0      | -H <sub>2</sub> O        |                    |
| 1026.5                                          | 1026.38 | 3           | 1               | 0   | 1      | 2AB                      |                    |
| 1154.9                                          | 1155.38 | 4           | 2               | 1   | 0      | -H <sub>2</sub> O        |                    |
| 1317.2                                          | 1317.43 | 5           | 2               | 1   | 0      | -H <sub>2</sub> O        |                    |

|        |         |   |   |   |   |                   |  |
|--------|---------|---|---|---|---|-------------------|--|
| 1334.6 | 1334.49 | 3 | 2 | 1 | 1 | 2AB               |  |
| 1364.2 | 1364.50 | 4 | 2 | 0 | 1 | 2AB               |  |
| 1493.8 | 1493.51 | 5 | 3 | 1 | 0 | -H <sub>2</sub> O |  |
| 1657.7 | 1658.61 | 5 | 2 | 1 | 1 | 2AB               |  |
| 1834.5 | 1834.59 | 5 | 3 | 1 | 1 | 2AB               |  |

-  = GlcNAc
-  = Man
-  = O-MeHex
-  = Xyl
